# Supplementary material
Source: publisher site journal article supplement (https://www.degruyterbrill.com/publication/isbn/9783110258172/downloadAsset/9783110258172_Inhaltsverzeichnis.pdf)
Supplement: Supplementary file 1 [file 9783110258172_Inhaltsverzeichnis.pdf]

# Inhalt

|                                                                                                                                  |     |
|----------------------------------------------------------------------------------------------------------------------------------|-----|
| Vorbemerkung .....                                                                                                               | V   |
| 1. Übersetzen und historische Hermeneutik: Historische und methodische Voraussetzungen .....                                     | 1   |
| 1.1 Übersetzen zwischen Voß und Wilamowitz .....                                                                                 | 3   |
| 1.2 Zur Fragestellung .....                                                                                                      | 10  |
| 2. Aristophanes: Zu Rezeption und Übersetzbarkeit .....                                                                          | 13  |
| 2.1 Paradigmen der Rezeption .....                                                                                               | 19  |
| 2.1.1 »Nicht hinlänglich verbundene Theile«. Zur Form der Alten Komödie ....                                                     | 19  |
| 2.1.2 »Dass mit der Aristophanischen Art des Spottes Gesinnung nicht vereinbar sei«. Namentliche Verspottung, Aischrologie ..... | 23  |
| 2.1.3 »Schmutzige Dinge«. Die obszöne Sprache .....                                                                              | 27  |
| 2.2 Aristophanes in der Goethezeit und im Vormärz .....                                                                          | 32  |
| 2.2.1 Literatur .....                                                                                                            | 33  |
| 2.2.2 Philologie .....                                                                                                           | 39  |
| 2.2.3 Übersetzung .....                                                                                                          | 43  |
| 3. Johann Gustav Droysen .....                                                                                                   | 53  |
| 3.1 Biographische Kontexte .....                                                                                                 | 56  |
| 3.1.1 Droysens andere Übersetzungen: Aischylos, Cicero .....                                                                     | 56  |
| 3.1.2 Die erste Fassung der <i>Vögel</i> .....                                                                                   | 60  |
| 3.1.3 Der Hermokopiden-Aufsatz .....                                                                                             | 66  |
| 3.1.4 Droysens Aristophanes-Auffassung .....                                                                                     | 69  |
| 3.1.5 Entstehung, Hilfsmittel, Druck .....                                                                                       | 77  |
| 3.2 Theoretische Kontexte .....                                                                                                  | 83  |
| 3.2.1 Die 1830er Jahre: Philologie, Philosophie, Geschichte, Poesie .....                                                        | 84  |
| 3.2.2 Zu Droysens Auffassung von Geschichte und Sprache .....                                                                    | 89  |
| 3.2.3 Zu Droysens Übersetzungskonzept .....                                                                                      | 98  |
| 4. Übersetzungsanalyse .....                                                                                                     | 109 |
| 4.1 Vergleichskategorien .....                                                                                                   | 112 |
| 4.1.1 Strategien mimetischen Übersetzens .....                                                                                   | 112 |
| 4.1.2 Nichtmimetische und antikklassizistische Strategien .....                                                                  | 118 |
| 4.1.3 Übersetzen als historische Arbeit? .....                                                                                   | 130 |

|       |                                                                            |     |
|-------|----------------------------------------------------------------------------|-----|
| 4.2   | Textbeispiele .....                                                        | 138 |
| 4.2.1 | <i>Die Vögel</i> (1835) .....                                              | 139 |
|       | Beispiel 1: V. 1–26 (Dialog Rathefreund / Hoffegut) .....                  | 140 |
|       | Beispiel 2: V. 227–262 (Lied des Tereus) .....                             | 147 |
|       | Beispiel 3: V. 1199–1237 (Dialog Rathefreund / Iris) .....                 | 154 |
| 4.2.2 | <i>Die Wespen</i> (1837) .....                                             | 160 |
|       | Beispiel 4: V. 15–45 (Dialog Sosias / Xanthias) .....                      | 161 |
|       | Beispiel 5: V. 488–507 (Hasskleons Rede) .....                             | 167 |
| 4.2.3 | <i>Die Frösche</i> (1838) .....                                            | 171 |
|       | Beispiel 6: V. 323–353 (Einzugshymnos des Chors) .....                     | 173 |
|       | Beispiel 7: V. 814–829 (Strophisches Chorlied) .....                       | 177 |
|       | Beispiel 8: V. 1281–1322 (Wettstreit zwischen Aischylos und Euripides).... | 182 |
| 5.    | Erfolg und Wirkung .....                                                   | 191 |
| 5.1   | Aufnahme durch die Kritik .....                                            | 191 |
| 5.2   | Auflagen und Nachdrucke .....                                              | 195 |
| 6.    | Schluss: Poetische Vergegenwärtigung, historische Distanz .....            | 197 |
| 7.    | Anhang .....                                                               | 203 |
| 7.1   | Synopse der Übersetzungsbeispiele .....                                    | 203 |
|       | Beispiel 1: V. 1–26 (Dialog Rathefreund / Hoffegut) .....                  | 204 |
|       | Beispiel 2: V. 227–262 (Lied des Tereus) .....                             | 210 |
|       | Beispiel 3: V. 1199–1237 (Dialog Rathefreund / Iris) .....                 | 214 |
|       | Beispiel 4: V. 15–45 (Dialog Sosias / Xanthias) .....                      | 222 |
|       | Beispiel 5: V. 488–507 (Hasskleons Rede) .....                             | 228 |
|       | Beispiel 6: V. 323–353 (Einzugshymnos des Chors) .....                     | 232 |
|       | Beispiel 7: V. 814–829 (Strophisches Chorlied) .....                       | 236 |
|       | Beispiel 8: V. 1281–1322 (Wettstreit zwischen Aischylos und Euripides).... | 240 |
| 7.2   | Literaturverzeichnis .....                                                 | 246 |
| 7.2.1 | Droysens Aristophanes-Übersetzung: Auflagen und Nachdrucke .....           | 246 |
| 7.2.2 | Schriften Droysens .....                                                   | 247 |
| 7.2.3 | Aristophanes: Verwendete Textausgaben und Kommentare .....                 | 252 |
| 7.2.4 | Aristophanes: Andere Übersetzungen .....                                   | 253 |
| 7.2.5 | Andere Literatur .....                                                     | 257 |
| 7.3   | Personenregister .....                                                     | 274 |
| 7.4   | Sachregister .....                                                         | 279 |
